# Supplementary material for: Synthesis of dissymmetric phosphorus dendrimers using an unusual protecting group
Source: Royal Society of Chemistry journal article supplement (doi:10.1039/c8nj01229f), 2018-01-01
Supplement: c8nj01229f1.pdf [file c8nj01229f1.pdf]

Synthesis of dissymmetric phosphorus dendrimers using an unusual protecting group

Evgeny K. Apartsin<sup>a\*</sup>, Alya G. Venyaminova<sup>a</sup>, Serge Mignani<sup>b,c</sup>, Anne-Marie Caminade<sup>d,e</sup>, Jean-Pierre Majoral<sup>d,e\*</sup>

<sup>a</sup> Institute of Chemical Biology and Fundamental Medicine SB RAS, 8, Lavrentiev ave., Novosibirsk, 630090, Russian Federation.

<sup>b</sup> Laboratoire de Chimie et de Biochimie Pharmacologiques et Toxicologiques, Université Paris Descartes, PRES Sorbonne Paris Cité, CNRS UMR 8601, 75006 Paris, France;

<sup>c</sup> Centro de Química da Madeira, MMRG, Universidade da Madeira, 9000-390 Funchal, Portugal;

<sup>d</sup> Laboratoire de Chimie de Coordination du CNRS, 205, route de Narbonne, 31077 Toulouse Cedex 04, France.

<sup>e</sup> LCC-CNRS, Université de Toulouse, CNRS, Toulouse, France

\* E-mail: [eka@niboch.nsc.ru](mailto:eka@niboch.nsc.ru) (E. K. Apartsin), [jean-pierre.majoral@lcc-toulouse.fr](mailto:jean-pierre.majoral@lcc-toulouse.fr) (J.-P. Majoral)

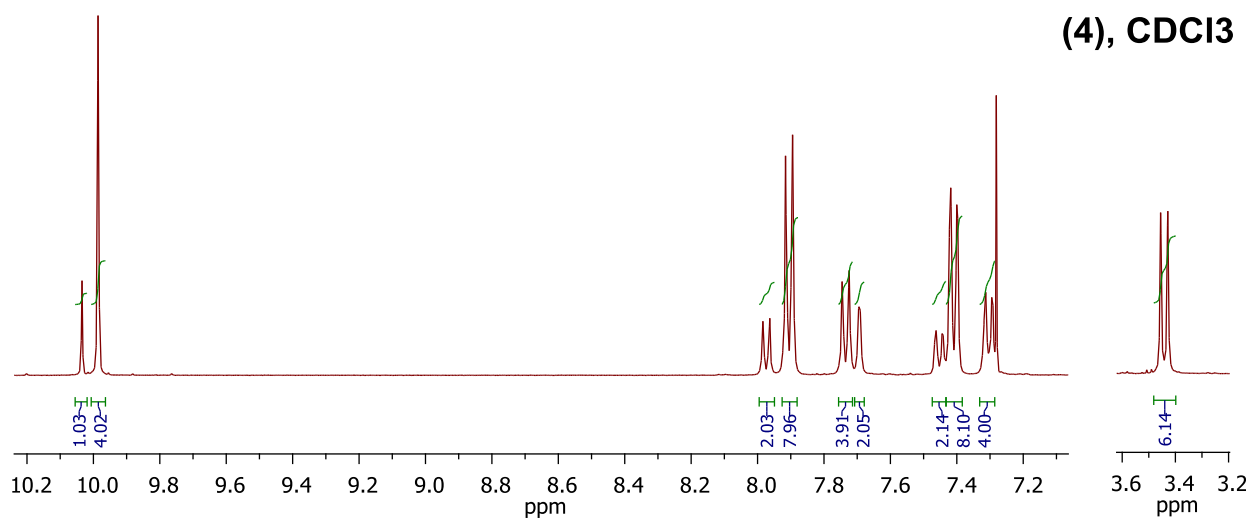

**Fig. S1.** <sup>1</sup>H NMR spectrum of the dissymmetric dendrimer (4) (G0'-P(S)-(G1')<sub>2</sub>). The signals of groups belonging to G0' and G1' are clearly distinguished.

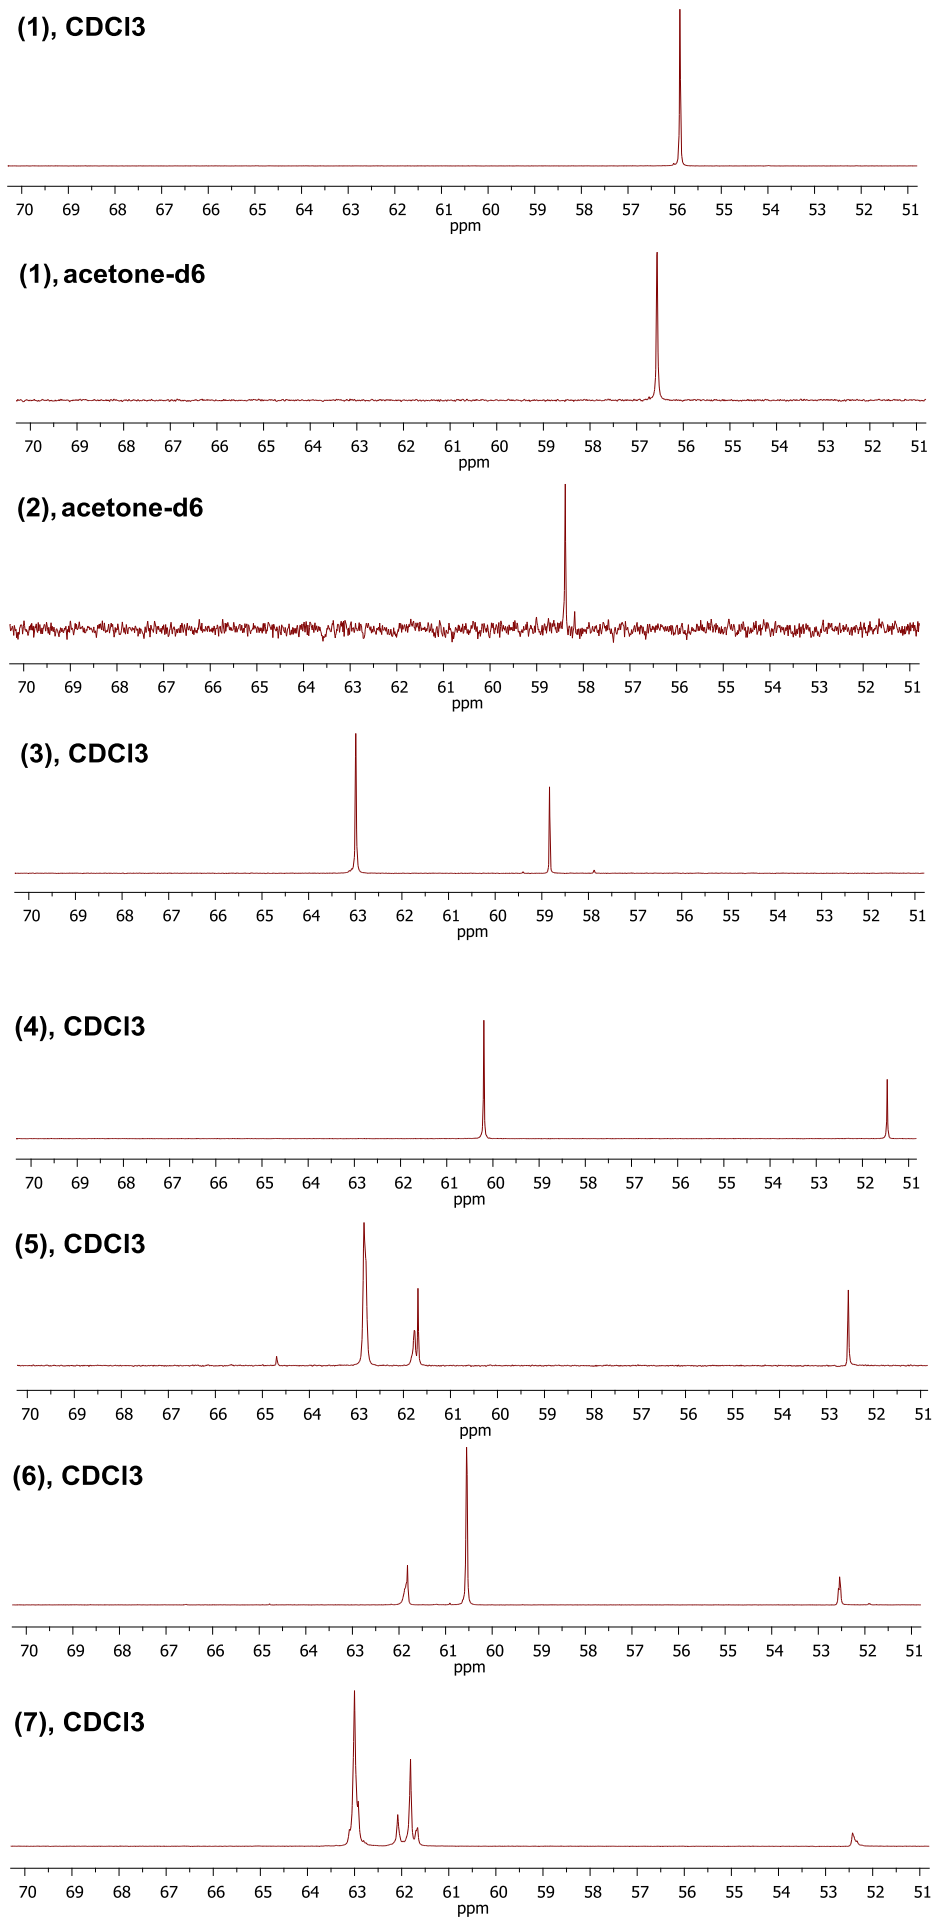

**Fig. S2.** Evolution of  $^{31}\text{P}\{^1\text{H}\}$  NMR spectra of neutral  $\text{P}(\text{S})\text{Cl}_2$ -terminated dissymmetric dendrimers

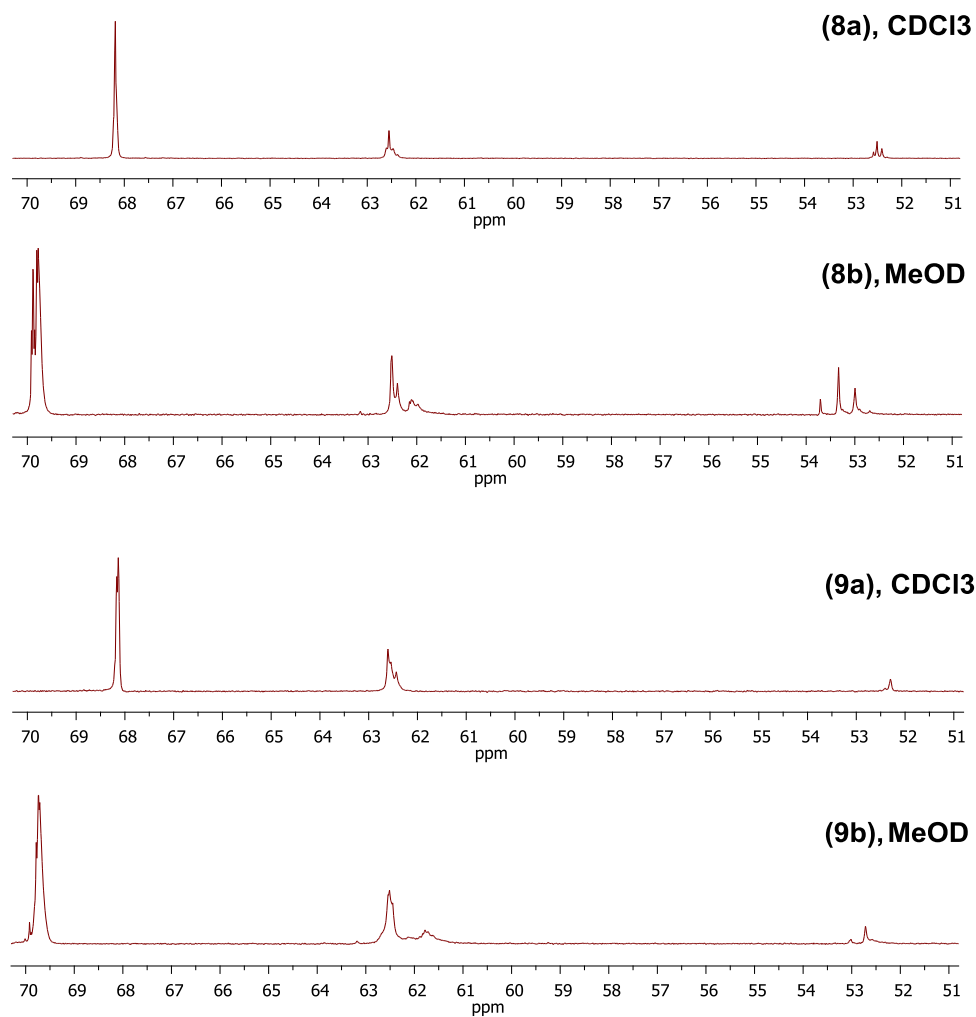

**Fig. S3.**  $^{31}\text{P}\{^1\text{H}\}$  NMR spectra of neutral amino-modified dissymmetric dendrimers (**8a**) and (**9a**), and their protonated forms (**8b**) and (**9b**)
